# Supplementary material
Source: PubMed Central journal article supplement (PMC2875079)

## Supporting Information

### “Discovery, Biological Evaluation and Structure-Activity Relationship of Amidine-based Sphingosine Kinase Inhibitors”

Thomas P. Mathews<sup>1</sup>, Andrew J. Kennedy<sup>1, 2, 2</sup>, Oana Nicoara<sup>3,4</sup>, Manjula Sunkara<sup>5</sup>, Andrew J. Morris<sup>5</sup>, Brian R. Wamhoff<sup>3,4</sup>, Kevin R. Lynch<sup>2</sup> and Timothy L. Macdonald<sup>\*,1,2</sup>

<sup>1</sup>University of Virginia Department of Chemistry, McCormick Road, Charlottesville, VA 22904, <sup>2</sup>University of Virginia Department of Pharmacology, Jefferson Park Avenue, Charlottesville, VA 22904, <sup>3</sup>University of Virginia Department of Medicine, Cardiovascular Division, <sup>4</sup>The Robert M. Berne Cardiovascular Research Center, Charlottesville, VA 22904, <sup>5</sup>University of Kentucky Department of Internal Medicine, Lexington, KY 40506

S1 – **VPC94075**; **9** <sup>1</sup>H & <sup>13</sup>C NMR

S2 – **13** <sup>1</sup>H & <sup>13</sup>C NMR

S3 – **20** <sup>1</sup>H & <sup>13</sup>C NMR

S4 – **22** <sup>1</sup>H & <sup>13</sup>C NMR

### VPC94075; 9 <sup>1</sup>H NMR

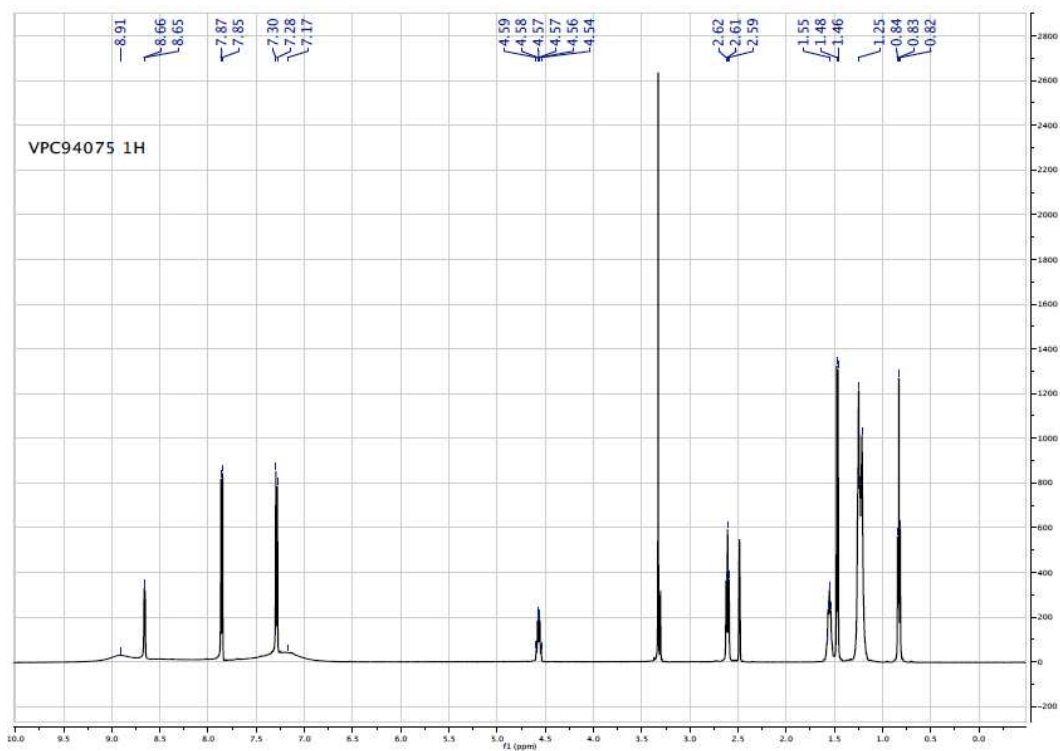

### VPC94075; 9 <sup>13</sup>C NMR

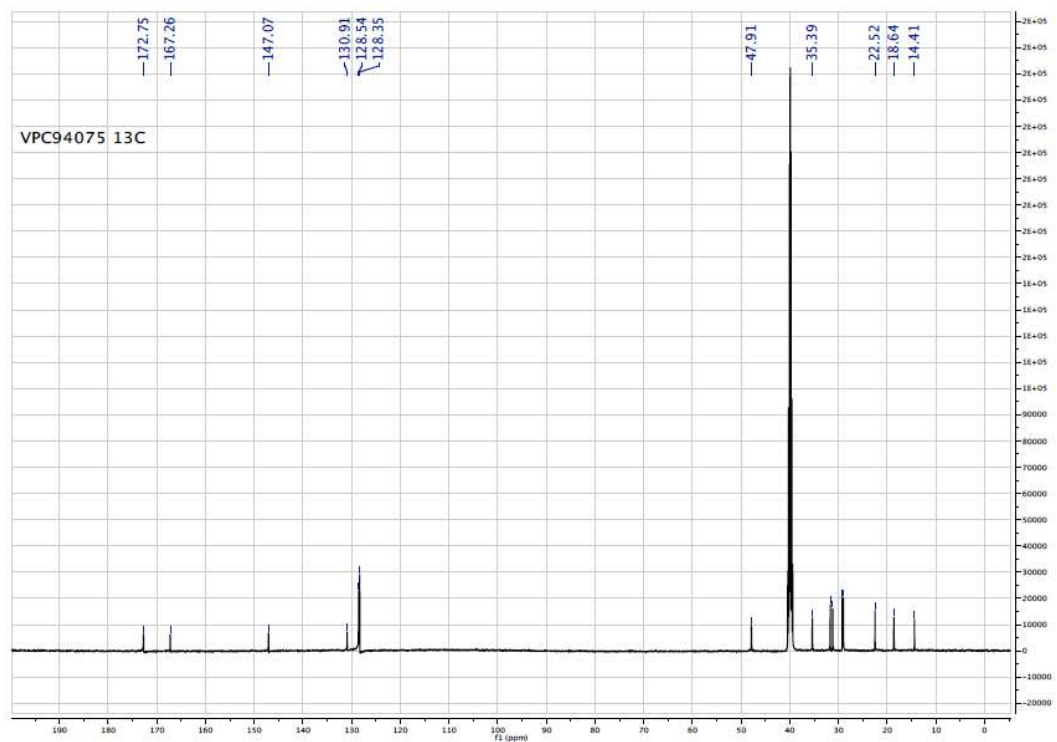

### $^1\text{H}$ NMR

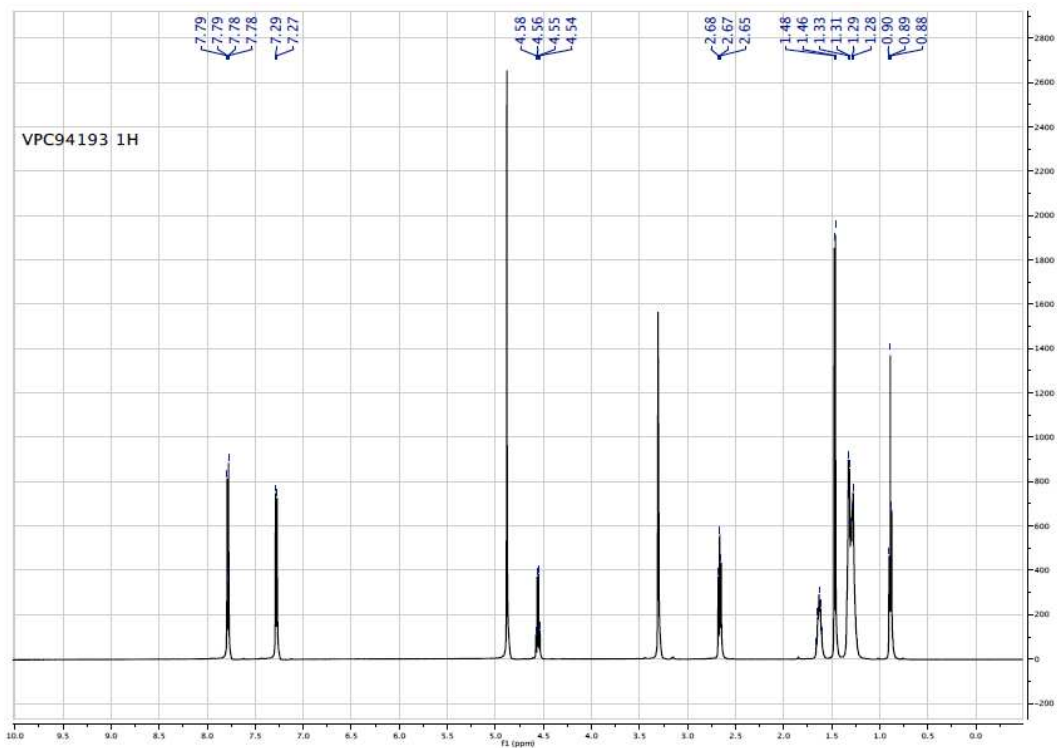

### $^{13}\text{C}$ NMR

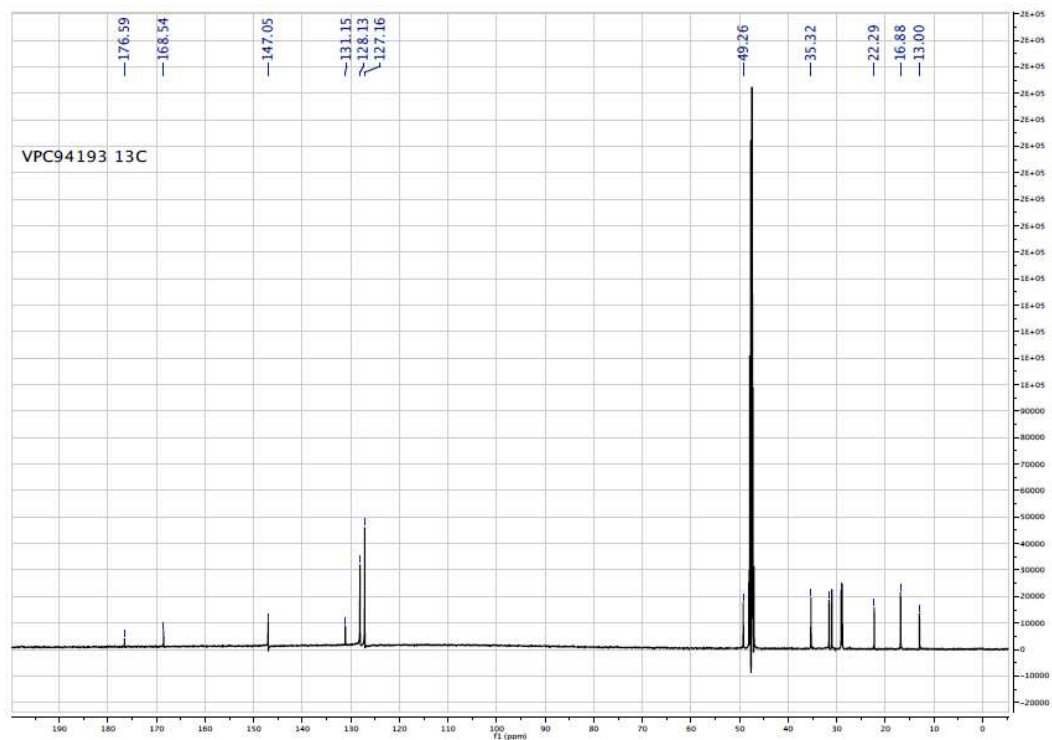

## $^{1}\text{H}$ NMR

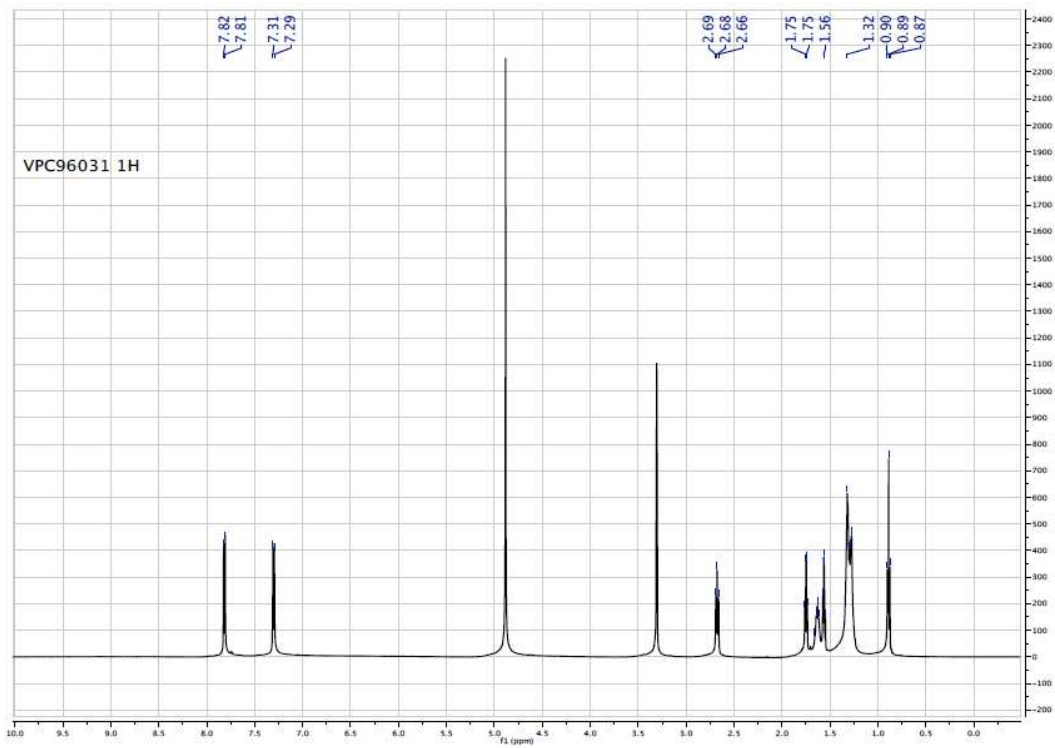

## $^{13}\text{C}$ NMR

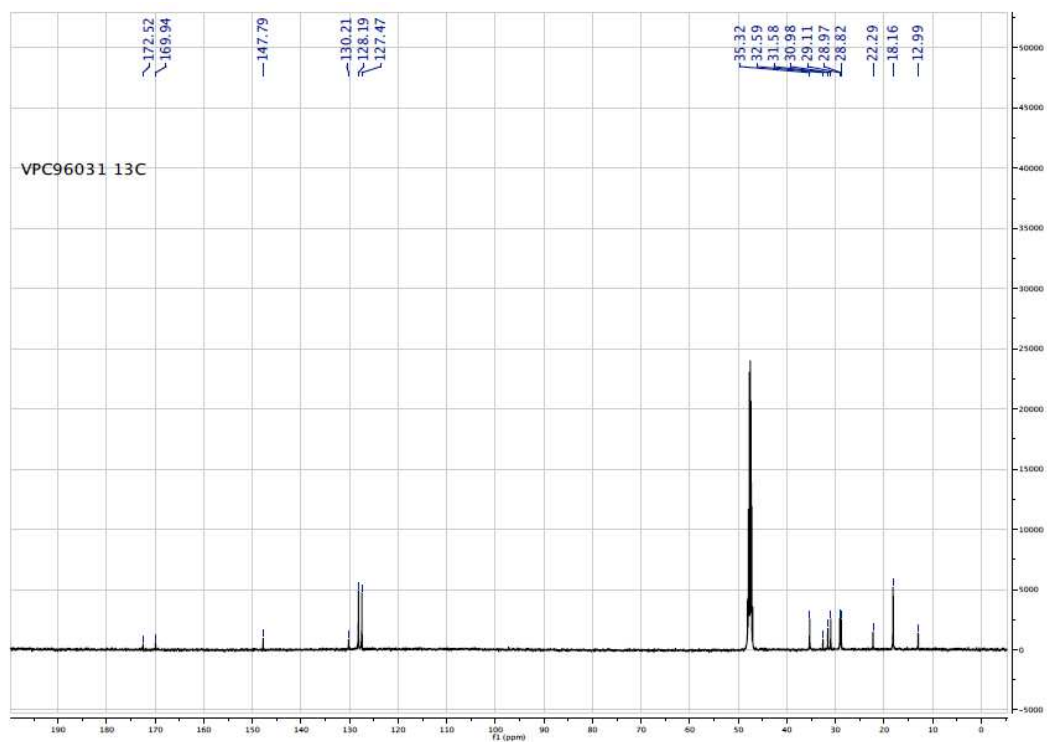

## 22 $^1\text{H}$ NMR

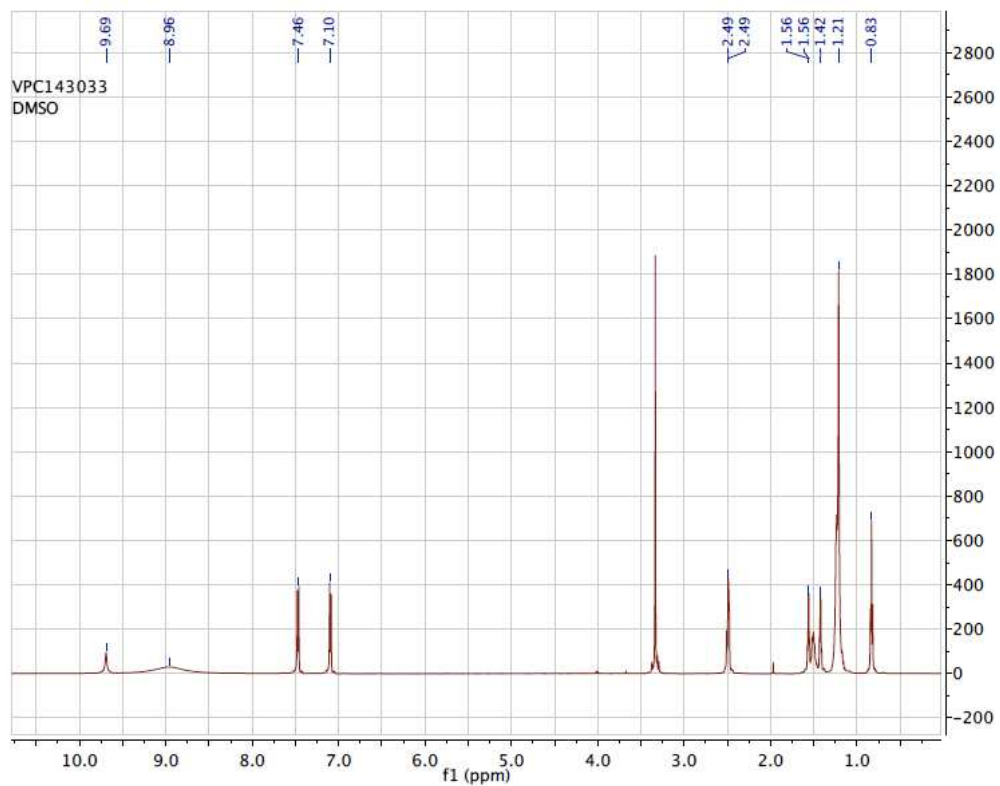

## 22 $^{13}\text{C}$

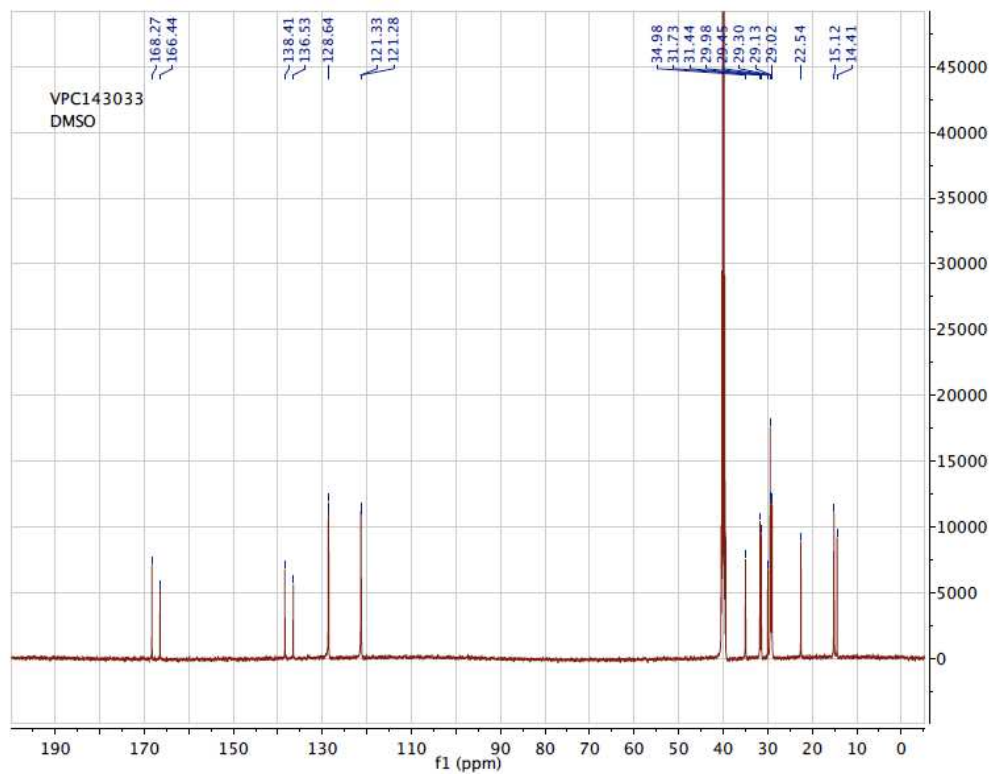

Supplement: NIHMS185711-supplement-1_si_001.pdf [file NIHMS185711-supplement-1_si_001.pdf]
